# Supplementary material for: Natural Cannabichromene (CBC) Shows Distinct Scalemicity Grades and Enantiomeric Dominance in Cannabis sativa Strains
Source: PubMed Central journal article supplement (PMC10152484; doi:10.1021/acs.jnatprod.2c01139), 2023-04-06
Supplement: np2c01139_si_001.pdf [file np2c01139_si_001.pdf]

## Supporting Information

### Natural Cannabichromene (CBC) Shows Distinct Scalemicity Grades and Enantiomeric Dominance in *Cannabis sativa* Strains

|                                                                            |           |
|----------------------------------------------------------------------------|-----------|
| <b>Calibration curves</b>                                                  | <b>S1</b> |
| <b>Chromatogram of cannabinoids standard mixture (RP-UHPLC)</b>            | <b>S2</b> |
| <b>Chromatographic resolutions RP-UHPLC</b>                                | <b>S3</b> |
| <b>Chromatograms (UV and CD traces) NP-eHPLC of CBC isolated fractions</b> | <b>S4</b> |

# Calibration curves S1

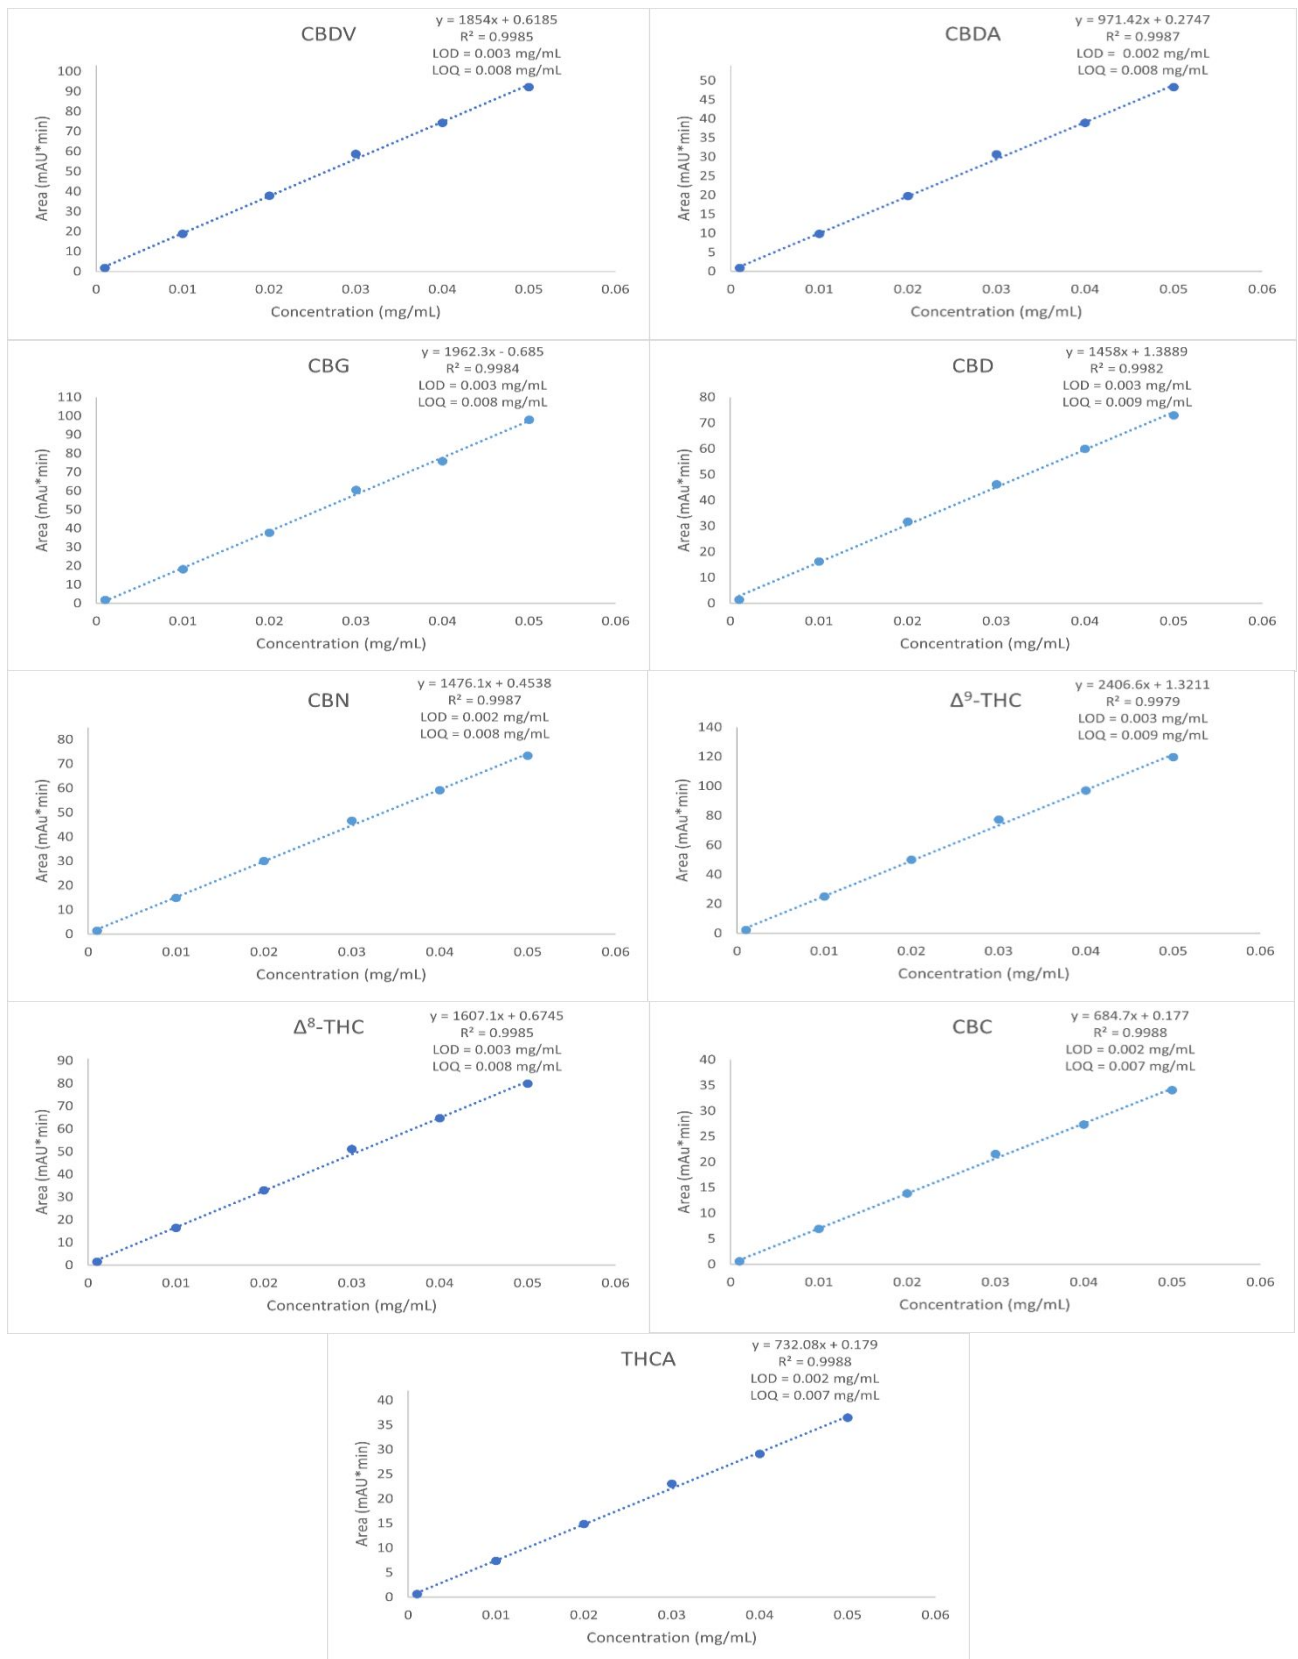

Figure S1. Calibration curves of standard cannabinoids.

## Chromatogram of cannabinoids standard mixture (RP-UHPLC)

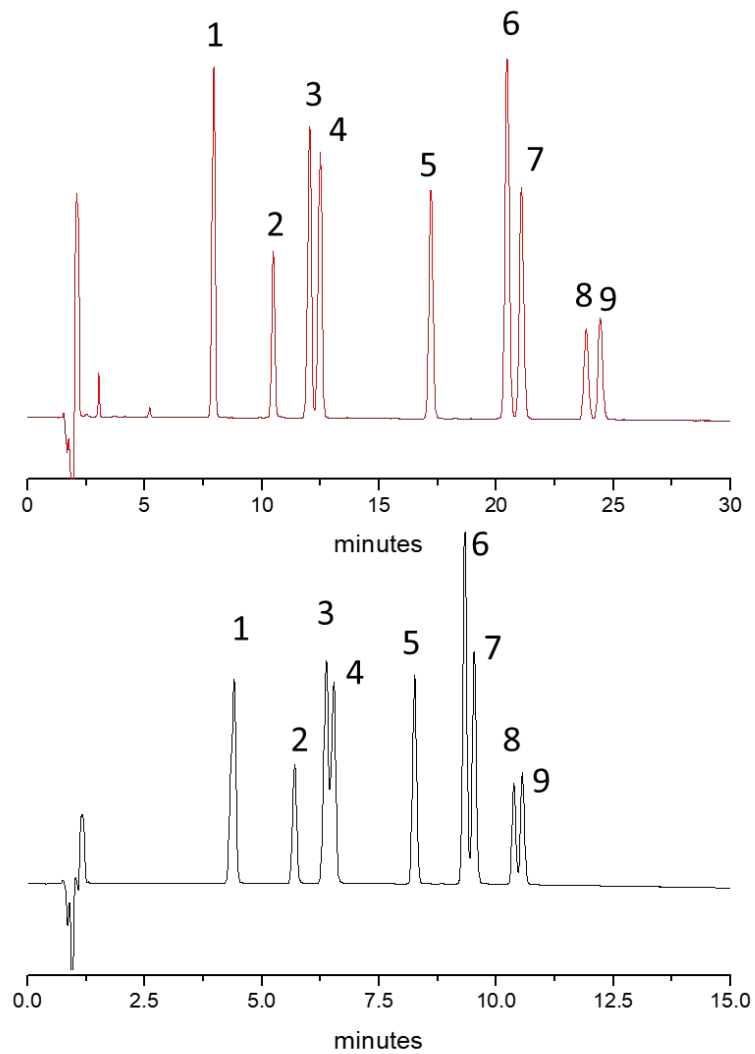

**Figure S2.** Chromatograms of standard cannabinoids mixture: CBDV (1), CBDA (2), CBG (3), CBD (4), CBN (5),  $\Delta^9$ -THC (6),  $\Delta^8$ -THC (7), CBC (8), THCA (9). Top) Elution conditions: two Titan C18 columns in series, flow rate 0.5 mL/min; Down) Elution conditions: one Titan C18 column, flow rate 0.5 mL/min.

## Chromatographic resolutions RP-UHPLC

**Table S1.** Resolution registered for each cannabinoid in the two chromatographic separation conditions.

|                                 |            | <b>1</b> | <b>2</b> | <b>3</b> | <b>4</b> | <b>5</b> | <b>6</b> | <b>7</b> | <b>8</b> | <b>9</b> |
|---------------------------------|------------|----------|----------|----------|----------|----------|----------|----------|----------|----------|
| one Titan C18 column            | Resolution | n.a.     | 6.82     | 3.72     | 0.79     | 9.37     | 6.73     | 1.28     | 5.57     | 1.21     |
| two Titan C18 columns in series | Resolution | n.a.     | 10.08    | 5.69     | 1.48     | 15.09    | 9.92     | 1.80     | 7.92     | 1.69     |

### Chromatograms (UV and CD traces) NP-eHPLC of CBC isolated fractions

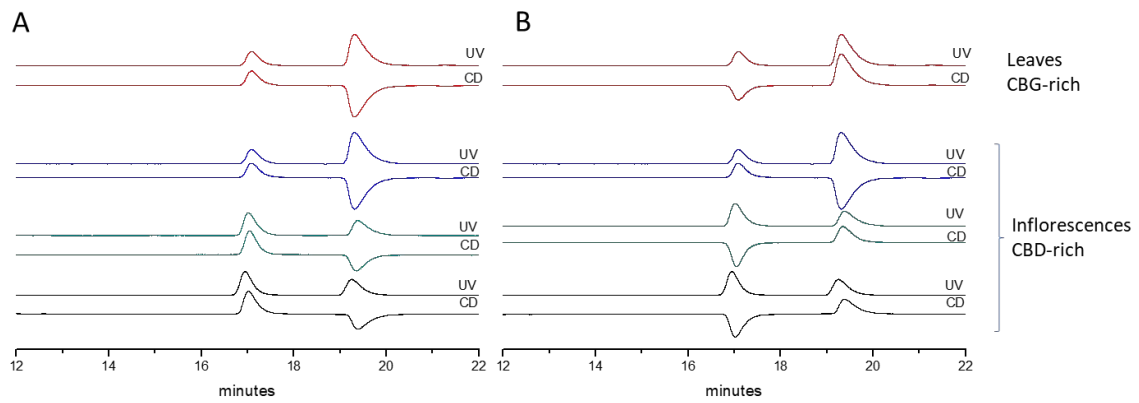

**Figure S3.** Chromatograms on (*S,S*)-WhelkO1 (A) and (*R,R*)-WhelkO1 (B) column of CBC purified fraction from Finola (black-traces), Orange (green-traces), Carmagnola AZ Greenlake (Blue-traces) and OGM1 C37 (red-traces) cultivars. Detection UV and CD at 280 nm.
